# Supplementary material for: Myricetin Allosterically Inhibits the Dengue NS2B-NS3 Protease by Disrupting the Active and Locking the Inactive Conformations
Source: PubMed Central journal article supplement — ACS Omega. 2022 Jan 11;7(3):2798–808. doi: 10.1021/acsomega.1c05569 (PMC8793048; doi:10.1021/acsomega.1c05569), 2022-01-11
Supplement: ao1c05569_si_001.pdf [file ao1c05569_si_001.pdf]

**Myricetin allosterically inhibits Dengue NS2B-NS3 protease by disrupting the active and locking the inactive conformations**

**Mei Dang<sup>1</sup>, Liangzhong Lim<sup>1</sup>, Amrita Roy, Jianxing Song\***

Department of Biological Sciences, Faculty of Science; National University of Singapore; 10 Kent Ridge Crescent, Singapore 119260

**Short title:** Mechanism for myricetin to allosterically inhibit Dengue protease

---

\* To whom correspondence should be addressed. Phone: 65 65161013. Fax: 65 6779 2486. E-mail: [dbssjx@nus.edu.sg](mailto:dbssjx@nus.edu.sg).

<sup>1</sup>The two authors contribute equally.

## Supplementary Figures

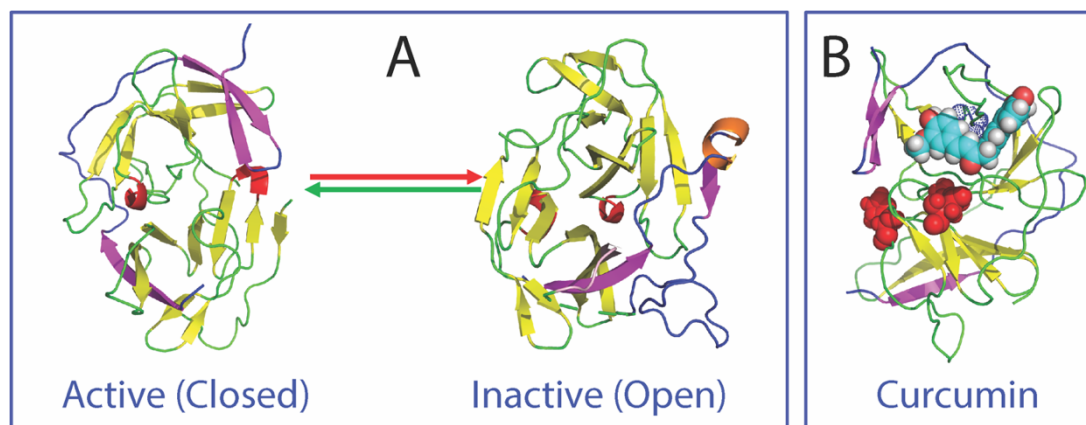

### Figure S1. Conformational equilibrium and allosteric inhibition by Curcumin.

(A) Conformational equilibrium of the active (closed) and inactive (open) forms of Dengue NS2B-NS3 protease. (B) The active form of Dengue protease in complex with Curcumin (in spheres) at AS1. Red spheres are used to indicate the catalytic triad composed of His51, Asp75 and Ser135.

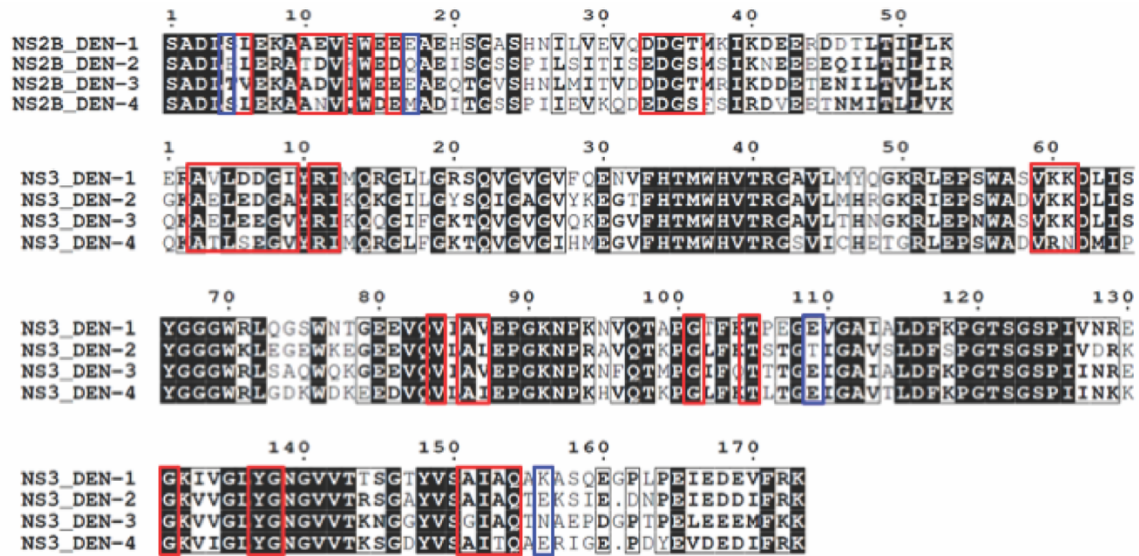

**Figure S2. Alignment of NS2B and NS3 sequences of four serotypes of DENV.**  
 The significantly perturbed residues were boxed with different colors: red for the identical or consensus residues and blue for the different residues.
